# Supplementary material for: Complete Genome Sequence of Amazon Lily Mosaic Virus Isolated From Amaryllis (Hippeastrum Hybridum Hort.)
Source: Research Square preprint supplement (doi:10.21203/rs.3.rs-1316498/v1), 2022-02-08
Supplement: Supplementary file 1 [file 1b51dc959edafe968401977c.docx]

Table S1. Accession numbers of potyviruses used for sequence analysis in this study

| Scientific name | Abbreviation | Accession number |
| --- | --- | --- |
| *African eggplant mosaic virus* | AEMV | MF997470 |
| *Algerian watermelon mosaic virus* | AWMV | EU410442 |
| *Apium virus Y* | ApVY | HM363516 |
| *Arracacha mottle virus* | AMoV | DQ925486 |
| *Artichoke latent virus** | ArLV | KP405232 |
| *Asparagus virus 1* | AV1 | KJ830760 |
| *Banana bract mosaic virus* | BBrMV | DQ851496 |
| *Barbacena virus Y* | BarVY | KU685505 |
| *Basella rugose mosaic virus* | BaRMV | DQ821938 |
| *Bean common mosaic necrosis virus* | BCMNV | U19287 |
| *Blackeye cowpea mosaic virus* | BlCMV | AJ312437 |
| *Bean yellow mosaic virus* | BYMV | D83749 |
| *Beet mosaic virus* | BtMV | AY206394 |
| *Begonia flower breaking virus* | BFBV | MN592680 |
| *Bidens mosaic virus* | BiMV | KF649336 |
| *Bidens mottle virus* | BiMoV | AF538686 |
| *Blue squill virus A* | BSVA | JQ807999 |
| *Brugmansia mosaic virus* | BruMV | JX867236 |
| *Brugmansia suaveolens mottle virus* | BsMoV | AB551370 |
| *Callistephus mottle virus* | CalMoV | KX013584 |
| *Canna yellow streak virus* | CaYSV | GQ421689 |
| *Carrot thin leaf virus* | CTLV | JX156434 |
| *Catharanthus mosaic virus* | CatMV | KP343681 |
| *Celery mosaic virus* | CeMV | HQ676607 |
| *Chilli ringspot virus* | CRSV | JN008909 |
| *Chilli veinal mottle virus* | ChiVMV | AJ237843 |
| *Clover yellow vein virus* | ClYVV | AB011819 |
| *Cocksfoot streak virus* | CSV | AF499738 |
| *Colombian datura virus* | CDV | JQ801448 |
| *Costus stripe mosaic virus* | CoSMV | MK286375 |
| *Cowpea aphid-borne mosaic virus* | CABMV | AF348210 |
| *Cucurbit vein banding virus* | CVBV | KY657266 |
| *Cyrtanthus elatus virus A* | CEVA | JQ723475 |
| *Daphne mosaic virus* | DapMV | DQ299908 |
| *Daphne virus Y* | DVY | KU556609 |
| *Dasheen mosaic virus* | DsMV | AJ298033 |
| *Dendrobium chlorotic mosaic virus* | DeCMV | MK241979 |
| *Dioscorea mosaic virus* | DMV | MH206616 |
| *Donkey orchid virus A* | DOVA | JX156422 |
| *East Asian Passiflora distortion virus* | EAPDV | LC379162 |
| *East Asian passiflora virus* | EAPV | AB246773 |
| *Freesia mosaic virus* | FreMV | FM206346 |
| *Fritillary virus Y* | FVY | AM039800 |
| *Gloriosa stripe mosaic virus* | GSMV | EF427894 |
| *Gomphocarpus mosaic virus* | GoMV | LC228573 |
| *Habenaria mosaic virus* | HaMV | AB818538 |
| *Hardenbergia mosaic virus* | HarMV | HQ161081 |
| *Hippeastrum mosaic virus* | HiMV | JQ395040 |
| *Hyacinth mosaic virus* | HyaMV | KY828925 |
| *Impatiens flower break virus* | IFBV | KU981084 |
| *Iris severe mosaic virus* | ISMV | KT692938 |
| *Japanese yam mosaic virus* | JYMV | AB027007 |
| *Jasmine virus T* | JVT | KT222674 |
| *Johnsongrass mosaic virus* | JGMV | Z26920 |
| *Keunjorong mosaic virus* | KjMV | JF838187 |
| *Konjac mosaic virus* | KoMV | AB219545 |
| *Leek yellow stripe virus* | LYSV | AJ307057 |
| *Lettuce Italian necrotic virus* | LINV | KP769852 |
| *Lettuce mosaic virus* | LMV | X97705 |
| *Lily mottle virus* | LMoV | AJ564636 |
| *Lily virus Y* | LVY | MF543013 |
| *Lupinus mosaic virus* | LuMV | EU847625 |
| *Maize dwarf mosaic virus* | MDMV | AJ001691 |
| *Mashua virus Y* | MasVY | MH680824 |
| *Mediterranean ruda virus* | MeRV | MF953305 |
| *Moroccan watermelon mosaic virus* | MWMV | EF579955 |
| *Narcissus degeneration virus* | NDV | AM182028 |
| *Narcissus late season yellows virus* | NLSYV | KC691259 |
| *Narcissus yellow stripe virus* | NYSV | AM158908 |
| *Noni mosaic virus* | NoMV | MN114634 |
| *Onion yellow dwarf virus* | OYDV | AJ510223 |
| *Ornithogalum mosaic virus* | OrMV | JQ807997 |
| *Panax virus Y* | PanVY | GQ916624 |
| *Papaya leaf distortion mosaic virus* | PLDMV | BD171712 |
| *Papaya ringspot virus* | PRSV | X67673 |
| *Paris mosaic necrosis virus* | PMNV | MF509898 |
| *Paris virus 1* | ParV1 | MN549985 |
| *Passiflora mottle virus* | PaMoV | MH286883 |
| *Passion fruit woodiness virus* | PWV | HQ122652 |
| *Pea seed-borne mosaic virus* | PSbMV | D10930 |
| *Peanut mottle virus* | PeMoV | AF023848 |
| *Pecan mosaic-associated virus* | PMaV | KT633868 |
| *Pennisetum mosaic virus* | PenMV | AY642590 |
| *Pepper mottle virus* | PepMoV | M96425 |
| *Pepper severe mosaic virus* | PepSMV | AM181350 |
| *Pepper veinal mottle virus* | PVMV | DQ645484 |
| *Pepper yellow mosaic virus* | PepYMV | AB541985 |
| *Peru tomato mosaic virus* | PTV | AJ437280 |
| *Platycodon mild mottle virus* | PlaMMV | MH779625 |
| *Pleione flower breaking virus* | PlFBV | MH376747 |
| *Plum pox virus* | PPV | AJ243957 |
| *Pokeweed mosaic virus* | PkMV | JX291161 |
| *Potato virus A potato virus A* | PVA | AJ296311 |
| *Potato virus V potato virus V* | PVV | AJ243766 |
| *Potato virus Y potato virus Y* | PVY | U09509 |
| *Potato yellow blotch virus* | PYBV | JX294310 |
| *Saffron latent virus* | SaLV | KY562565 |
| *Scallion mosaic virus* | ScaMV | AJ316084 |
| *Shallot yellow stripe virus* | SYSV | AJ865076 |
| *Sorghum mosaic virus* | SrMV | AJ310197 |
| *Soybean mosaic virus* | SMV | D00507 |
| *Sudan watermelon mosaic virus* | SuWMV | KY623505 |
| *Sugarcane mosaic virus* | SCMV | AJ297628 |
| *Sunflower chlorotic mottle virus* | SCMoV | GU181199 |
| *Sunflower mild mosaic virus* | SMMV | JQ350738 |
| *Sunflower ring blotch virus* | SuRBV | KX856009 |
| *Sweet potato feathery mottle virus* | SPFMV | D86371 |
| *Sweet potato latent virus* | SPLV | KC443039 |
| *Sweet potato virus 2* | SPV2 | JN613807 |
| *Sweet potato virus C* | SPVC | GU207957 |
| *Sweet potato virus G* | SPVG | JQ824374 |
| *Tamarillo leaf malformation virus* | TLMV | KM523548 |
| *Telosma mosaic virus* | TelMV | DQ851493 |
| *Thunberg fritillary mosaic virus* | TFMV | AJ851866 |
| *Tobacco etch virus* | TEV | M11458 |
| *Tobacco mosqueado virus* | TMosqV | KT834407 |
| *Tobacco vein banding mosaic virus* | TVBMV | EF219408 |
| *Tobacco vein mottling virus* | TVMV | X04083 |
| *Tomato necrotic stunt virus* | TNSV | JQ314463 |
| *Turnip mosaic virus* | TuMV | AF169561 |
| *Ugandan passiflora virus* | UPV | MK110656 |
| *Vanilla distortion mosaic virus* | VDMV | KF906523 |
| *Verbena virus Y* | VVY | EU564817 |
| *Watermelon mosaic virus* | WMV | AY437609 |
| *Wild melon banding virus* | WMVBV | KY623506 |
| *Wild onion symptomless virus* | WoSV | LC159494 |
| *Wild potato mosaic virus* | WPMV | AJ437279 |
| *Wild tomato mosaic virus* | WTMV | DQ851495 |
| *Wisteria vein mosaic virus* | WVMV | AY656816 |
| *Yam mild mosaic virus* | YMMV | JX470965 |
| *Yam mosaic virus* | YMV | U42596 |
| *Yambean mosaic virus* | YBMV | JN190431 |
| *Zantedeschia mild mosaic virus* | ZaMMV | AY626825 |
| *Zea mosaic virus* | ZeMV | JQ692088 |
| *Zucchini shoestring virus* | ZSV | KU355553 |
| *Zucchini tigre mosaic virus* | ZTMV | KC345607 |
| *Zucchini yellow mosaic virus* | ZYMV | AF127929 |

**Artichoke latent virus* belonging to the genus *Macluravirus* is used as an outgroup.
